# Supplementary material
Source: PubMed Central journal article supplement (PMC2568838)
Supplement: 10.3163.1536-5050.96.4.006.sg004.pdf [file 10.3163.1536-5050.96.4.006.sg004.pdf]

**Lay information mediary behavior uncovered: exploring how nonprofessionals seek health information for themselves and others online**

**Jennie A. Abrahamson, MLIS; Karen E. Fisher, PhD; Anne G. Turner, MLIS; Joan C. Durrance, PhD; Tammara Combs Turner, MS**

**Table 5**  
 Other resources consulted/helpful besides NC Health Info (NCHI)

| Source (multiple answers allowed)                                | Lay information mediaries (LIMs) n=38* |     | Direct-users n=91† |     |
|------------------------------------------------------------------|----------------------------------------|-----|--------------------|-----|
|                                                                  | N                                      | %   | N                  | %   |
| <b>Where else have you turned for information on this topic?</b> |                                        |     |                    |     |
| Health care provider                                             | 23                                     | 61% | 39                 | 43% |
| Friend or relative                                               | 16                                     | 42% | 27                 | 30% |
| Other website                                                    | 13                                     | 34% | 38                 | 42% |
| Newspapers/magazines/books                                       | 11                                     | 29% | 18                 | 20% |
| Scholarly or professional journals                               | 5                                      | 13% | 14                 | 15% |
| Other person                                                     | 4                                      | 11% | 3                  | 3%  |
| Yellow pages                                                     | 3                                      | 8%  | 15                 | 17% |
| Other source                                                     | 3                                      | 8%  | 4                  | 4%  |
| TV/radio                                                         | 0                                      | 0   | 5                  | 6%  |
| No response                                                      | 0                                      | 0   | 3                  | 3%  |
| <b>Which of these has been most helpful to you?</b>              |                                        |     |                    |     |
| Health care provider                                             | 12                                     | 33% | 33                 | y   |
| Friend or relative                                               | 10                                     | 28% | 15                 | 17% |
| Other website                                                    | 6                                      | 17% | 31                 | 36% |
| Newspapers/magazines/books                                       | 3                                      | 8%  | 7                  | 8%  |
| Scholarly or professional journals                               | 2                                      | 6%  | 2                  | 2%  |
| Other person                                                     | 2                                      | 6%  | 7                  | 8%  |
| Yellow pages                                                     | 1                                      | 3%  | 6                  | 7%  |
| Other source                                                     | 1                                      | 3%  | 5                  | 6%  |
| TV/radio                                                         | 0                                      | 0   | 1                  | 1%  |
| No response                                                      | 7                                      | 19% | 11                 | 13% |

\* 36 respondents (5 LIMs and 31 direct users) indicated that they had not searched on this topic before; their responses were excluded.

† 43 respondents (7 LIMs and 36 direct users) indicated that they had not searched on this topic before; their responses were excluded.
